# Supplementary material
Source: PubMed Central journal article supplement (PMC6645880)
Supplement: ao7b02068_si_001.pdf [file ao7b02068_si_001.pdf]

## **Supporting Information**

### **Firefly Luciferase Mutant with Enhanced Activity and Thermostability**

Tania Pozzo<sup>1</sup>, Farhima Akter<sup>1</sup>, Yoko Nomura<sup>2</sup>, Angelique Y. Louie<sup>1</sup>, Yohei Yokobayashi<sup>2\*</sup>

#### **Authors/Affiliations:**

<sup>1</sup> Department of Biomedical Engineering, University of California at Davis, One Shields Ave, Davis, California 95616, United States

<sup>2</sup>Nucleic Acid Chemistry and Engineering Unit, Okinawa Institute of Science and Technology Graduate University, Onna, Okinawa 904 0495, Japan

#### **Corresponding Author**

\*E-mail: yohei.yokobayashi@oist.jp

#### **Table of contents**

**Figure S1.** SDS-PAGE of purified enzymes.

**Figure S2.** Time course of luciferase variant light emissions.

**Figure S3.** Plasmid map.

**Figure S4.** DNA sequence of the luciferase expression cassette.

**Figure S5.** Amino acid sequences of WT and YY5.

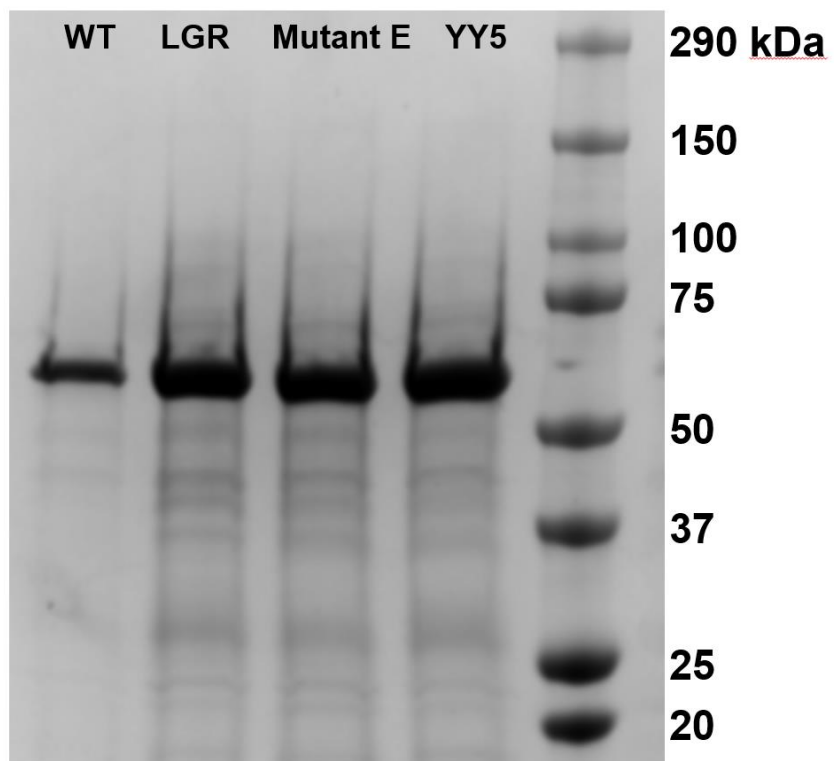

**Figure S1.** SDS-PAGE image of the purified luciferase variants. All purified protein samples were assessed for purity prior to dialysis. All four enzymes displayed the expected molecular weight of approximately 62 kDa.

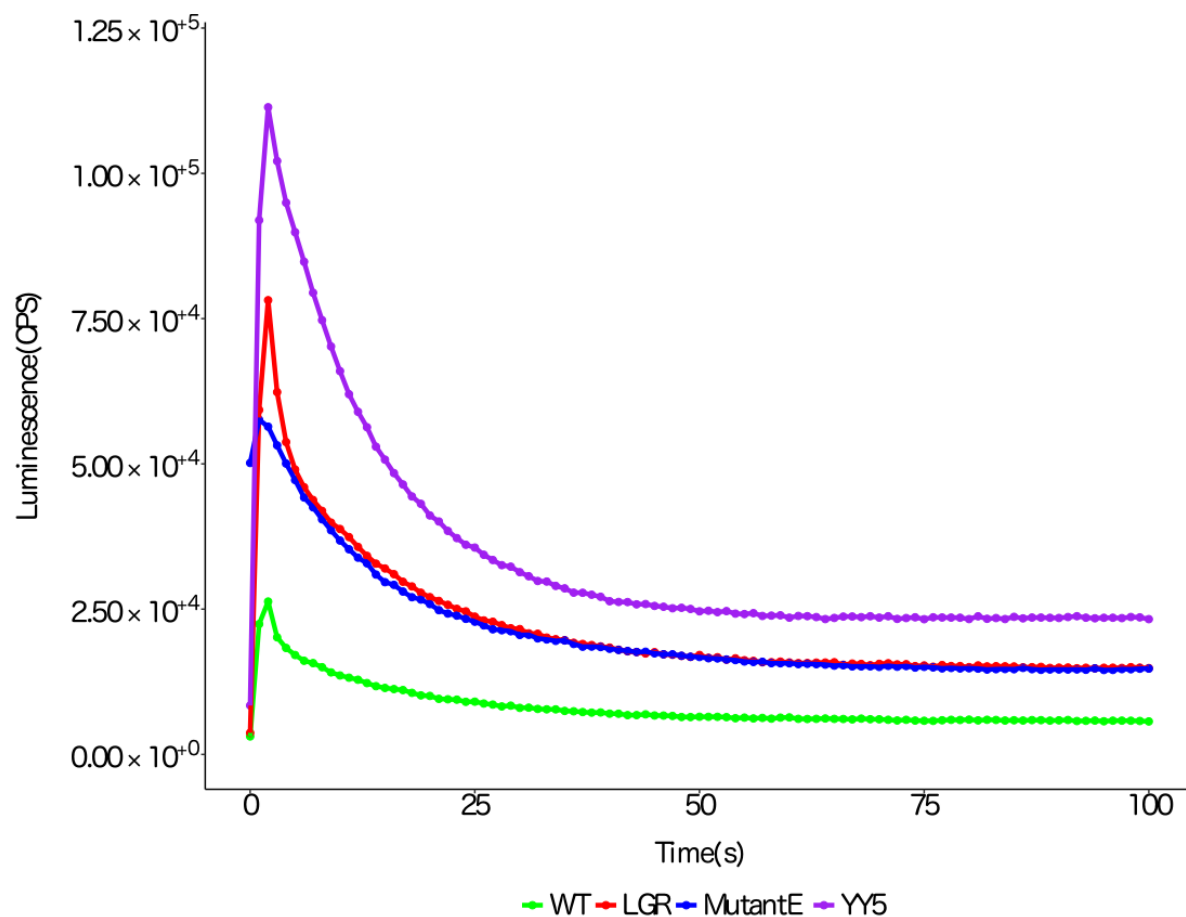

**Figure S2.** Luminescence time course of the luciferase variants. Each reaction contained 50  $\mu$ M D-Luciferin, 2 mM ATP, and 1.6  $\mu$ g/mL enzyme. The initial burst (flash) was observed within the first 5 s of the reaction followed by the steady glow phase. The measurements were recorded using Fluorolog-3 spectrofluorometer (HORIBA).

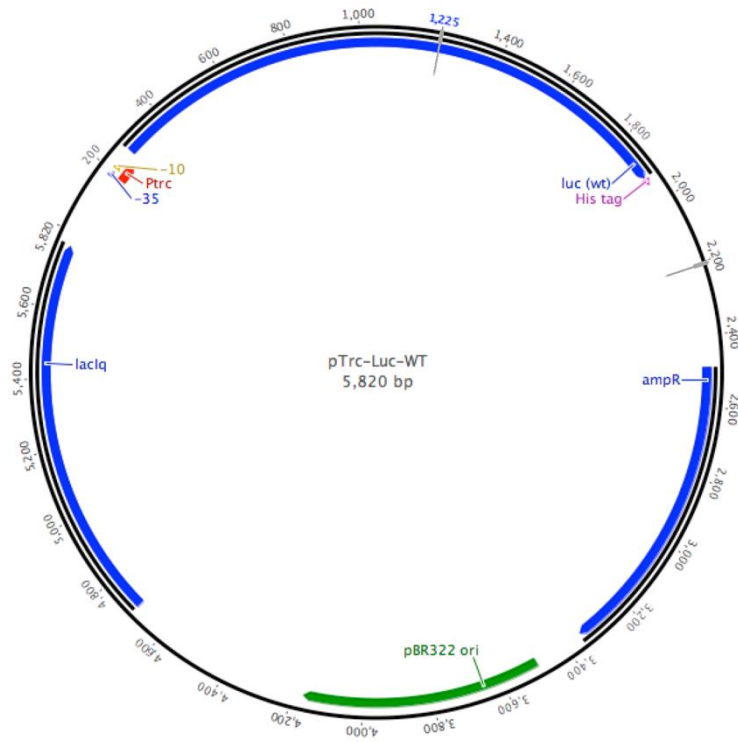

**Figure S3.** Map of the luciferase expression plasmids. Ptrc: trc promoter, luc (wt): luciferase coding gene, His tag: 6x histidine tag, ampR: ampicillin resistance marker ( $\beta$ -lactamase), pBR322 ori: origin of replication, lacIq: Lac repressor.

```

CTGTTGACAA TTAATCATCC GGCTCGTATA ATGTGTGGAA TTGTGAGCGG ATAACAATTG 60
AATTAAGCTT TCAGGAGGTA TGAGATGGAA GACGCCAAAA ACATAAAGAA AGGCCCGGCG 120
CCATTCTATC CTCTAGAGGA TGAACCGCT GGAGAGCAAC TGCATAAGGC TATGAAGAGA 180
TACGCCCTGG TTCCTGGAAC AATTGCTTTT ACAGATGCAC ATATCGAGGT GAACATCACG 240
TACGCGGAAT ACTTCGAAAT GTCCGTTTCG TTGGCAGAAG CTATGAAACG ATATGGGCTG 300
AATACAAATC ACAGAATCGT CGTATGCAGT GAAAACCTCT TCAATTCTT TATGCCGGTG 360
TTGGGCGCGT TATTTATCGG AGTTGCAGTT GCGCCCGCGA ACGACATTTA TAATGAACGT 420
GAATTGCTCA ACAGTATGAA CATTTCGCAG CCTACCGTAG TGTTTGTTC CAAAAAGGGG 480
TTGCAAAAAA TTTTGAACGT GCAAAAAAAA TTACCAATAA TCCAGAAAAT TATTATCATG 540
GATTCTAAAA CGGATTACCA GGGATTTTCAG TCGATGTACA CGTTCGTCAC ATCTCATCTA 600
CCTCCCGGTT TTAATGAATA CGATTTTGTG CCAGATCCCT TTGATCGTGA CAAAACAATT 660
GCACTGATAA TGAATTCCTC TGGATCTACT GGGTTACCTA AGGGTGTGGC CCTTCCGCAT 720
AGAACTGCCT GCGTCAGATT CTCGCATGCC AGAGATCCTA TTTTGGCAA TCAAATCATT 780
CCGGATACTG CGATTTTAAG TGTTGTTCCA TTCCATCACG GTTTTGGAAT GTTTACTACA 840
CTCGGATATT TGATATGTGG ATTTTCGAGTC GTCTTAATGT ATAGATTTGA AGAAGAGCTG 900
TTTTTACGAT CCCTTCAGGA TTACAAAATT CAAAGTGCCT TGCTAGTACC AACCCATTTT 960
TCATTCTTCG CAAAAGCAC TCTGATTGAC AAATACGATT TATCTAATTT ACACGAAATT 1020
GCTTCTGGGG GCGCACCTCT TTCGAAAGAA GTCGGGGAAG CGGTTGCAA ACGCTTCCAT 1080
CTTCCAGGGA TACGACAAGG ATATGGGCTC ACTGAGACTA CATCAGCTAT TCTGATTACA 1140
CCCGAGGGG ATGATAAACC GGGCGCGGTC GGTAAGTTG TTCCATTTT TGAAGCGAAG 1200
GTTGTGGATC TGGATACCGG GAAAACGCTG GGCGTTAATC AGAGAGGCGA ATTATGTGTC 1260
AGAGGACCTA TGATTATGTC CGGTTATGTA AACAATCCGG AAGCGACCAA CGCCTTGATT 1320
GACAAGGATG GATGGCTACA TTCTGGAGAC ATAGCTTACT GGGACGAAGA CGAACACTTC 1380
TTCATAGTTG ACCGCTTGAA GTCTTTAATT AAATACAAAG GATATCAGGT GGCCCCCGCT 1440
GAATTGGAAT CGATATTGTT ACAACACCCC AACATCTTCG ACGCGGGCGT GGCAGGTCTT 1500
CCCGACGATG ACGCCGGTGA ACTTCCCGCC GCCGTTGTTG TTTTGGAGCA CGGAAAGACG 1560
ATGACGGAAA AAGAGATCGT GGATTACGTC GCCAGTCAAG TAACAACCGC GAAAAAGTTG 1620
CGCGGAGGAG TTGTGTTTGT GGACGAAGTA CCGAAAGGTC TTACCGGAAA ACTCGACGCA 1680
AGAAAAATCA GAGAATCCT CATAAAGGCC AAGAAGGGCG GAAAGTCAA ATTGCTCGAG 1740
CATCATCATC ATCATCATTG AGTTTAAACG GTCTCCAGCT TGGCTGTTTT GCGGGATGAG 1800
AGAAGATTTT CAGCCTGATA CAGATTAAAT CAGAACGCAG AAGCGGTCTG ATAAAACAGA 1860
ATTTGCCTGG CGGCAGTAGC GCGGTGGTCC CACCTGACCC CATGCCGAAC TCAGAAGTGA 1920
AACGCCGTAG CGCCGATGGT AGTGTGGGGT CTCCCCATGC GAGAGTAGGG AACTGCCAGG 1980
CATCAAATAA AACGAAAGGC TCAGTCGAAA GACTGGGCCT TTCGTTTTAT CTGTTGTTTG 2040

```

**Figure S4.** DNA sequence of the luciferase expression cassette. Red: trc promoter, blue: luciferase (WT) coding sequence, pink: 6x histidine tag, green: transcription terminator. The locations of the eight point mutations are highlighted. The codon changes made for the mutations are as follows: T214A (ACT>GCC), A215L (GCC>CTG), I232A (ATT>GCC), F295L(TTC>CTG), E345K(GAG>AAA), I423L (ATA>CTG), D436G (GAC>GGC), L530R (CTC>CGC).

**WT :**

MEDAKNIKKGPAPFYPLEDGTAGEQLHKAMKRYALVPGTIAFTDAHIEVNIITYAEYFEMSVRLAEAMKRYGLNTNHR  
IVVCSENSLQFFMPVLGALFIGVAVAPANDIYNERELLNSMNISQPTVVVFSKKGGLQKILNVQKKLP I IQK I IIMDS  
KTDYQGFQSMYTFVTSHLPPGFNEYDFVPESFDRDKTIALIMNSSGSTGLPKGVALPHR**T**ACVRFSHARDPIFGNQI  
**I**PDTAILSVVPFHHGFGMFTTLGYLICGFRVVLMYRFEEELFLRSLQDYKIQSALLVPTLFS**F**AKSTLIDKYDLSN  
LHEIASGGAPLSKEVGEAVAKRFHLPGIRQGYGLTETTSAILITP**E**GDDKPGAVGKVVPF**F**EAKVVDLDTGKTLGVN  
QRGELCVRGPMIMSGYVNNPEATNALIDKDGWLHSGD**I**AYWDEDEHFFIV**D**RLKSLIKYKGYQVAPAELESILLQHP  
NIFDAGVAGLPDDDAGELPAAVVVLEHGKTMTEKEIVDYVASQVTTAKKLRGGVVVDEVPKGLTGK**L**DARKIREIL  
IKAKKGGKSKLHHHHHH

**YY5 :**

MEDAKNIKKGPAPFYPLEDGTAGEQLHKAMKRYALVPGTIAFTDAHIEVNIITYAEYFEMSVRLAEAMKRYGLNTNHR  
IVVCSENSLQFFMPVLGALFIGVAVAPANDIYNERELLNSMNISQPTVVVFSKKGGLQKILNVQKKLP I IQK I IIMDS  
KTDYQGFQSMYTFVTSHLPPGFNEYDFVPESFDRDKTIALIMNSSGSTGLPKGVALPHR**A**LCVRFSHARDPIFGNQI  
**A**PDTAILSVVPFHHGFGMFTTLGYLICGFRVVLMYRFEEELFLRSLQDYKIQSALLVPTLFS**L**AKSTLIDKYDLSN  
LHEIASGGAPLSKEVGEAVAKRFHLPGIRQGYGLTETTSAILITP**K**GDDKPGAVGKVVPF**F**EAKVVDLDTGKTLGVN  
QRGELCVRGPMIMSGYVNNPEATNALIDKDGWLHSGD**L**AYWDEDEHFFIV**G**RLKSLIKYKGYQVAPAELESILLQHP  
NIFDAGVAGLPDDDAGELPAAVVVLEHGKTMTEKEIVDYVASQVTTAKKLRGGVVVDEVPKGLTGK**R**DARKIREIL  
IKAKKGGKSKLHHHHHH

**Figure S5.** Amino acid sequences of the WT luciferase and the YY5 mutant. The highlighted residues indicate the mutated amino acids. Yellow residues indicate mutations derived from Mutant E and green residues were derived from the LGR mutant.
